# Supplementary material
Source: HighWire-hosted journal article supplement (http://www.jneurosci.org/highwire/filestream/597536/field_highwire_adjunct_files/0/Appendix.pdf)

# APPENDIX

## A. Changes Observed across all VGLUT Regulation Experiments:

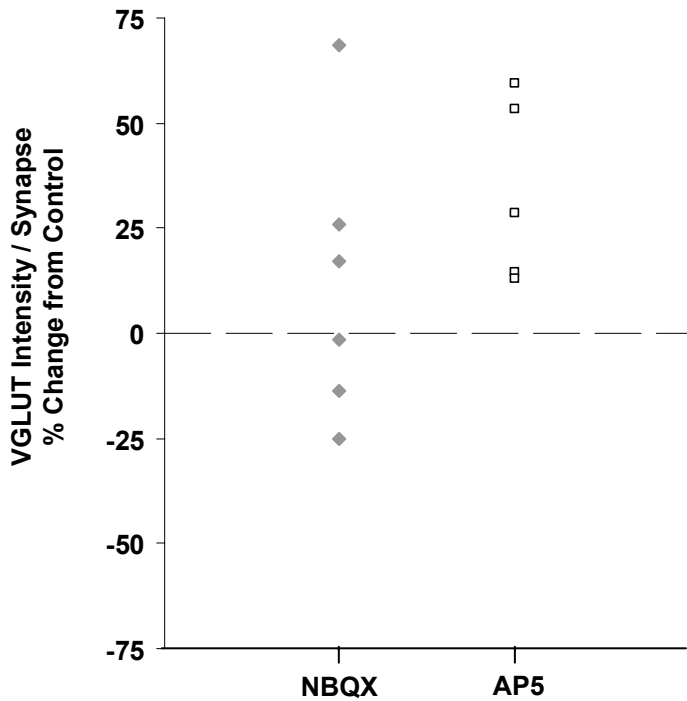

## B. Summary of all immunostaining VGLUT Regulation Experiments:

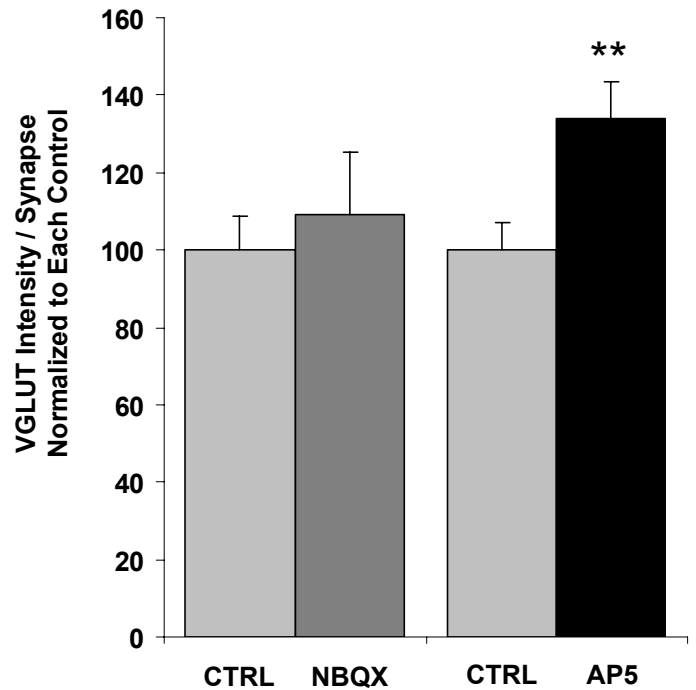

## C. Functional Changes Associated with VGLUT Expression Changes:

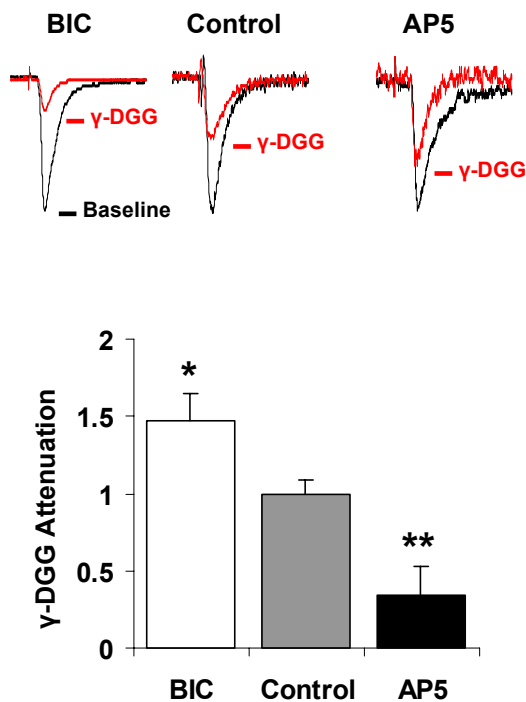

## D. Additional Treatments Capable of Triggering VGLUT Up-Regulation:

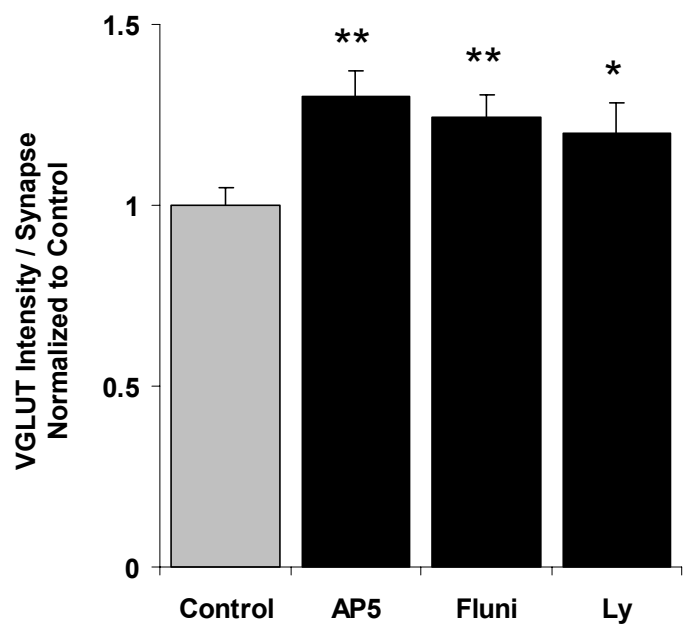

Supplement: Appendix.pdf [file Appendix.pdf]
